# Supplementary material for: Physical–Chemical and Sensory Quality of Oat Milk Produced Using Different Cultivars
Source: MDPI journal article supplement (doi:10.3390/foods12061165), 2023-03-09
Supplement: s1 [file s1]

Table S1 The ratio of hydrophilic/hydrophobic amino acids in four oat cultivars

|                                           | ZBY01                  | ZBY09                    | ZZH02                  | AO                      |
|-------------------------------------------|------------------------|--------------------------|------------------------|-------------------------|
| Hydrophilic/Hydrophobic<br>amino acids, % | 56.54±0.8 <sup>a</sup> | 54.85±0.63 <sup>ab</sup> | 53.5±0.07 <sup>b</sup> | 55.94±0.65 <sup>a</sup> |
